# Supplementary material for: Epitope-specific antibody responses differentiate COVID-19 outcomes and variants of concern
Source: PubMed Central journal article supplement (PMC8410046; doi:10.1172/jci.insight.148855), 2021-07-08
Supplement: jciinsight-6-148855-s034.pdf [file jciinsight-6-148855-s034.pdf]

**Epitope-specific antibody responses differentiate COVID-19 outcome  
and variants of concern**

Courtney Voss<sup>1,9</sup>, Sally Esmail<sup>1,9</sup>, Xuguang Liu<sup>1</sup>, Michael J. Knauer<sup>2</sup>, Suzanne Ackloo<sup>3</sup>, Tomonori Kaneko<sup>1</sup>, Lori Lowes<sup>2</sup>, Peter Stogios<sup>4</sup>, Almagul Seitova<sup>3</sup>, Ashley Hutchinson<sup>3</sup>, Farhad Yusifov<sup>3</sup>, Tatiana Skarina<sup>4</sup>, Elena Evdokimova<sup>4</sup>, Peter Loppnau<sup>4</sup>, Pegah Ghiabi<sup>4</sup>, Taraneh Haijan<sup>4</sup>, Shanshan Zhong<sup>1</sup>, Husam Abdoh<sup>2</sup>, Benjamin D. Hedley<sup>2</sup>, Vipin Bhayana<sup>2</sup>, Claudio M. Martin<sup>5,6</sup>, Marat Slessarev<sup>5,6</sup>, Benjamin Chin-Yee<sup>7</sup>, Douglas D. Fraser<sup>5,6,8</sup>, Ian Chin-Yee<sup>2</sup> and Shawn S-C. Li<sup>1\*</sup>

<sup>1</sup>Department of Biochemistry and <sup>2</sup>Department of Pathology and Laboratory Medicine, Western University, London, Ontario N6A 5C1; <sup>3</sup>Structural Genomics Consortium and <sup>4</sup>Department of Chemical Engineering and Applied Chemistry, University of Toronto, 101 College St., Toronto, Ontario M5G 1L7; <sup>5</sup>Department of Medicine, Western University, London, Ontario N6A 5C1; <sup>6</sup>London Health Sciences Centre, 800 Commissioners Rd E, London, Ontario N6A 5W9; <sup>7</sup>Division of Hematology and <sup>8</sup>Department of Pediatrics, Western University, London, Ontario N6A 5C1 Canada.

<sup>9</sup>These authors contributed equally to this work.

\*Corresponding author: Email: [sli@uwo.ca](mailto:sli@uwo.ca)

**Supplemental Table 1. Recombinant proteins and printing concentrations on the proteome array**

| <b>Protein</b>                   | <b>Residues</b>                             | <b>Printed Concentration</b> |
|----------------------------------|---------------------------------------------|------------------------------|
| IgG                              | Equitech Bio Inc<br>SLH66-0001              | 200nM                        |
| Spike Receptor Binding Domain    | ThermoFisher Scientific RP-87678<br>319-541 | 14μM                         |
| Spike Ectodomain                 | 1-1208                                      | 0.5μM                        |
| NSP3-unique                      | Replicase polyprotein 1ab 413-676           | 10μM                         |
| NSP3-ADRP                        | Replicase polyprotein 1ab 1024-1192         | 10μM                         |
| NSP3-PLPro                       | Replicase polyprotein 1ab 1561-1878         | 10μM                         |
| NSP3-nucleic acid binding domain | Replicase polyprotein 1ab 1867-2034         | 10μM                         |
| NSP4-C terminal Domain           | Replicase polyprotein 1ab 3173-3569         | 10μM                         |
| NSP5                             | Replicase polyprotein 1ab 3264-3569         | 10μM                         |
| NSP7                             | Replicase polyprotein 1ab 3860-3942         | 10μM                         |
| NSP8                             | Replicase polyprotein 1ab 3943-4140         | 10μM                         |
| NSP9                             | Replicase polyprotein 1ab 4141-4253         | 10μM                         |
| NSP10                            | Replicase polyprotein 1ab 4254-4392         | 10μM                         |
| NSP16                            | Replicase polyprotein 1ab 6799-7096         | 10μM                         |
| Nucleocapsid<br>(full length)    | RayBiotech 230-01104<br>1-419               | 5μM                          |
| Nucleocapsid Dimerization Domain | 247-364                                     | 5μM                          |
| Nucleocapsid RNA Binding Domain  | 47-173                                      | 5μM                          |

**Supplemental Table 2. Patient cohort used in this study**

| <b>Sample ID</b> | <b>ICU</b> | <b>Outcome</b> | <b>Severity</b> |
|------------------|------------|----------------|-----------------|
| COV+5            | N          | Alive          | Moderate        |
| COV+7            | N          | Alive          | Moderate        |
| COV+8            | N          | Alive          | Moderate        |
| COV+10           | N          | Alive          | Moderate        |
| COV+11*          | N          | Alive          | Moderate        |
| COV+14           | N          | Alive          | Moderate        |
| COV+17*          | N          | Alive          | Moderate        |
| COV+18*          | N          | Fatal          | Moderate        |
| COV+19*          | N          | Alive          | Moderate        |
| COV+26           | N          | Alive          | Moderate        |
| COV+27           | N          | Alive          | Moderate        |
| COV+28           | N          | Alive          | Moderate        |
| COV+29           | N          | Alive          | Moderate        |
| COV+30*          | N          | Alive          | Moderate        |
| COV+33           | N          | Alive          | Moderate        |
| COV+34           | N          | Alive          | Moderate        |
| COV+51           | N          | Alive          | Moderate        |
| COV+52           | N          | Alive          | Moderate        |
| COV+53*          | N          | Alive          | Moderate        |
| COV+55           | N          | Alive          | Moderate        |
| COV+56           | N          | Alive          | Moderate        |
| COV+57*          | N          | Alive          | Moderate        |
| COV+58           | N          | Alive          | Moderate        |
| COV+59           | N          | Alive          | Moderate        |
| COV+62           | N          | Alive          | Moderate        |
| COV+63           | N          | Alive          | Moderate        |
| COV+64           | N          | Alive          | Moderate        |
| COV+65*          | N          | Alive          | Moderate        |
| COV+67           | N          | Alive          | Moderate        |
| COV+70           | N          | Alive          | Moderate        |
| COV+72           | N          | Alive          | Moderate        |
| COV+73           | N          | Alive          | Moderate        |
| COV+74           | N          | Alive          | Moderate        |
| COV+75           | N          | Alive          | Moderate        |
| COV+76           | N          | Alive          | Moderate        |
| COV+81*          | N          | Alive          | Moderate        |
| COV+82*          | N          | Alive          | Moderate        |
| COV+83           | N          | Alive          | Moderate        |
| COV+84*          | N          | Alive          | Moderate        |
| COV+85*          | N          | Alive          | Moderate        |
| COV+86*          | N          | Alive          | Moderate        |

|         |   |       |          |
|---------|---|-------|----------|
| COV+87  | N | Alive | Moderate |
| COV+88  | N | Alive | Moderate |
| COV+89* | N | Alive | Moderate |
| COV+90* | N | Alive | Moderate |
| COV+91  | N | Alive | Moderate |
| COV+1   | Y | Alive | Severe   |
| COV+2   | Y | Fatal | Severe   |
| COV+3   | Y | Alive | Severe   |
| COV+4   | Y | Alive | Severe   |
| COV+6   | Y | Alive | Severe   |
| COV+9   | Y | Fatal | Severe   |
| COV+12  | N | Fatal | Severe   |
| COV+13* | N | Fatal | Severe   |
| COV+15* | Y | Fatal | Severe   |
| COV+16* | N | Fatal | Severe   |
| COV+20  | Y | Fatal | Severe   |
| COV+22  | Y | Alive | Severe   |
| COV+24  | Y | Alive | Severe   |
| COV+25* | Y | Alive | Severe   |
| COV+31  | Y | Alive | Severe   |
| COV+32  | Y | Alive | Severe   |
| COV+35  | Y | Fatal | Severe   |
| COV+36  | Y | Fatal | Severe   |
| COV+37  | Y | Fatal | Severe   |
| COV+38  | Y | Fatal | Severe   |
| COV+39  | Y | Alive | Severe   |
| COV+40  | Y | Fatal | Severe   |
| COV+41  | Y | Alive | Severe   |
| COV+42  | Y | Alive | Severe   |
| COV+43  | Y | Alive | Severe   |
| COV+44  | Y | Alive | Severe   |
| COV+45  | Y | Alive | Severe   |
| COV+46  | Y | Alive | Severe   |
| COV+47  | Y | Fatal | Severe   |
| COV+48  | Y | Alive | Severe   |
| COV+49  | Y | Fatal | Severe   |
| COV+50  | Y | Fatal | Severe   |
| COV+54  | Y | Alive | Severe   |
| COV+60  | Y | Alive | Severe   |
| COV+61  | Y | Alive | Severe   |
| COV+66  | Y | Alive | Severe   |
| COV+68* | Y | Alive | Severe   |
| COV+69* | N | Fatal | Severe   |

|         |   |       |          |
|---------|---|-------|----------|
| COV+71  | Y | Fatal | Severe   |
| COV+77  | Y | Fatal | Severe   |
| COV+78  | N | Fatal | Severe   |
| COV+79* | Y | Fatal | Severe   |
| COV+80* | N | Fatal | Severe   |
| COV-1   | N | Alive | Negative |
| COV-2   | N | Alive | Negative |
| COV-3   | N | Alive | Negative |
| COV-4   | N | Alive | Negative |
| COV-5   | N | Alive | Negative |
| COV-6   | N | Alive | Negative |
| COV-7   | N | Alive | Negative |
| COV-8   | N | Alive | Negative |
| COV-9   | N | Alive | Negative |
| COV-10  | N | Alive | Negative |
| COV-11  | N | Alive | Negative |
| COV-35  | N | Alive | Negative |
| COV-36  | N | Alive | Negative |
| COV-37  | N | Alive | Negative |
| COV-38  | N | Alive | Negative |
| COV-39  | N | Alive | Negative |
| COV-40  | N | Alive | Negative |
| COV-41  | N | Alive | Negative |
| COV-42  | N | Alive | Negative |
| COV-43  | N | Alive | Negative |
| COV-44  | N | Alive | Negative |
| COV-45  | N | Alive | Negative |
| COV-46  | N | Alive | Negative |
| COV-47  | N | Alive | Negative |
| COV-48  | N | Alive | Negative |
| COV-49  | N | Alive | Negative |
| COV-50  | N | Alive | Negative |

\*No antibodies detected; sample was removed from analysis. Moderate cases defined as those with intensive care unit (ICU) admission; Severe cases defined as patients admitted to ICU or fatal; cases defined as Negative were determined by quantitative PCR analysis for SARS-CoV-2.

**Supplemental Table 3. A list of literature reported epitopes examined in this study**

| Protein      | Residues   | Sequence               | Source | Confirmed on Peptide Array |
|--------------|------------|------------------------|--------|----------------------------|
| Spike        | 21-35      | RTQLPPAYTNSFTRG        | Δ      | Y                          |
| Spike        | 181-195    | GKQGNFKNLREFVFK        | Δ      | N                          |
| Spike        | 351-365    | YAWNRRKISNCVADY        | Δ      | N                          |
| Spike        | 451-465    | YLYRLFRKSNLKPFE        | Δ      | Y                          |
| Spike        | 801-815    | NFSQILPDPSKPSKR        | Δ      | N                          |
| Spike        | 811-825    | KPSKRSFIEDLLFNK        | Δ      | Y                          |
| Spike        | 881-895    | TITSGWTFGAGAALQ        | Δ      | Y                          |
| Spike        | 1041-1055  | DFCGKGYHLMSFPQS        | Δ      | N                          |
| Spike        | 1091-1105  | REGVFVSNNGTHWFVT       | Δ      | N                          |
| Spike        | 612-623    | YQDVNCTEVPVA           | δ      | N                          |
| Spike        | 491-504*** | PLQSYGFQPTNGVGT        | δ      | N                          |
| Spike        | 802-819    | FSQILPDPSKPSKRSFIE     | δ      | Y                          |
| Spike        | 888-902    | FGAGAALQIPFAMQM        | δ      | N                          |
| Spike        | 895-909    | QIPFAMQMAYRFNGI        | δ      | N                          |
| Spike        | 287-305    | DAVDCALDPLSETKCTLKS    | δ      | N                          |
| Spike        | 306-318*** | FTVEKGIYQTSNGGGTPCS    | δ      | N                          |
| Spike        | 588-598*** | NGGGTPCSFGGVSVI        | δ      | N                          |
| Spike        | 524-545    | VCGPKKSTNLVKNKCVNFNFN  | δ      | N                          |
| Spike        | 545-565    | GLTGTGVLTESNKKFLPFQQF  | δ      | Y                          |
| Spike        | 566-587    | GRDIADTTDAVRDPQTLEILDI | δ      | Y                          |
| Spike        | 601-611    | GTNTSNQVAVL            | δ      | N                          |
| Spike        | 624-640    | IHADQLTPTWRVYSTGS      | δ      | Y                          |
| Nucleocapsid | 61-75      | KEDLKFRGQGVPIIN        | Δ      | N                          |
| Nucleocapsid | 91-105     | TRRIRGGDGKMKDLS        | Δ      | N                          |
| Nucleocapsid | 161-175    | LPQGTTLPKGFYAEG        | Δ      | Y                          |
| Nucleocapsid | 201-215    | SSRGTSPARMAGNGG        | Δ      | Y                          |
| Nucleocapsid | 221-235    | LLLLDRLNQLESKMS        | Δ      | Y                          |
| Nucleocapsid | 251-265    | AAEASKKPRQKRTAT        | Δ      | Y                          |
| Nucleocapsid | 311-325    | ASAFFGMSRIGMEVT        | Δ      | N                          |
| Nucleocapsid | 361-375    | KTFPPTPEPKDKKKK        | Δ      | Y                          |
| Nucleocapsid | 371-385    | DKKKKADETQALPQR        | Δ      | Y                          |
| Nucleocapsid | 381-395    | ALPQRQKKQQTVTLL        | Δ      | Y                          |
| Nucleocapsid | 391-405    | TVTLLPAADLDDFSK        | Δ      | N                          |
| Nucleocapsid | 41-61      | RPQGLPNNTASWFTALTQH GK | δ      | Y                          |
| Nucleocapsid | 153**      | NNNAATVLQLPQGTTLPKG    | δ      | Y                          |
| Nucleocapsid | 355-375    | KHIDAYKTFPPTPEPKDKKKK  | δ      | Y                          |
| Nucleocapsid | 381-401**  | QPLPQRQKKQPTVTLLPAADM  | δ      | Y                          |
| Nucleocapsid | 368-391**  | PKKDKKKKTDEAQLPQRQKKQP | δ      | Y                          |

Δ Wang *et al.* (2020) *ACS Cent Sci* **6**: 2238-2249; δ Grifoni *et al.* (2020) *Cell Host Microbe* **27**: 671-680 e2. \*\* Based off SARS CoV sequence; \*\*\* Non-linear peptide from Grifoni *et al.* 2020

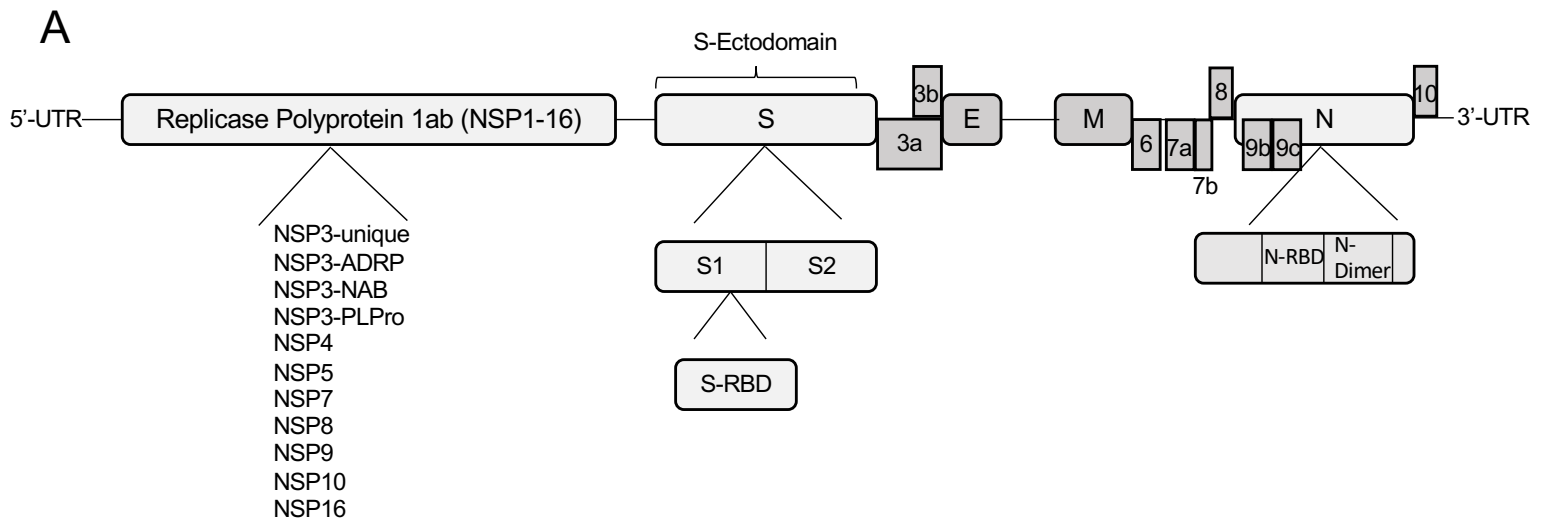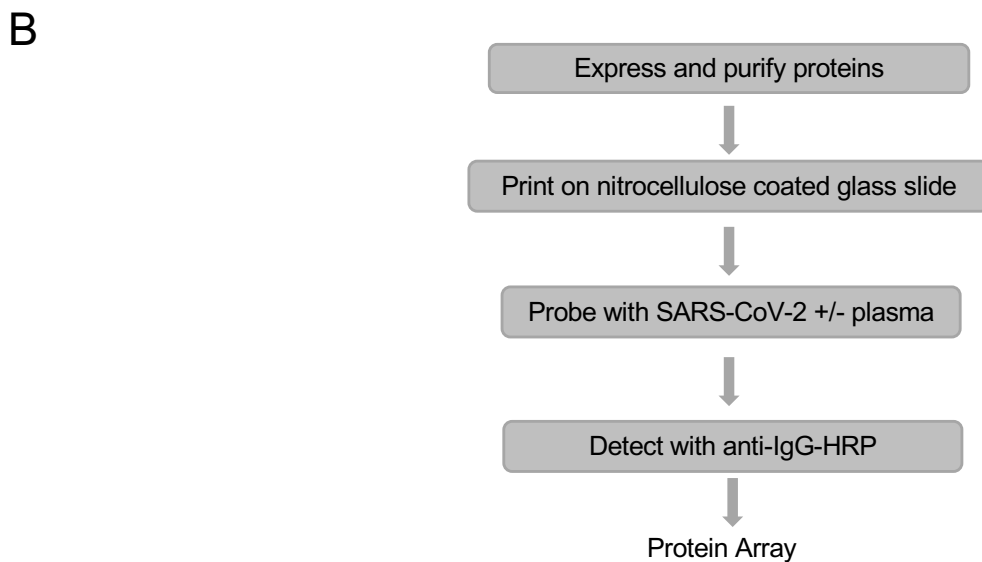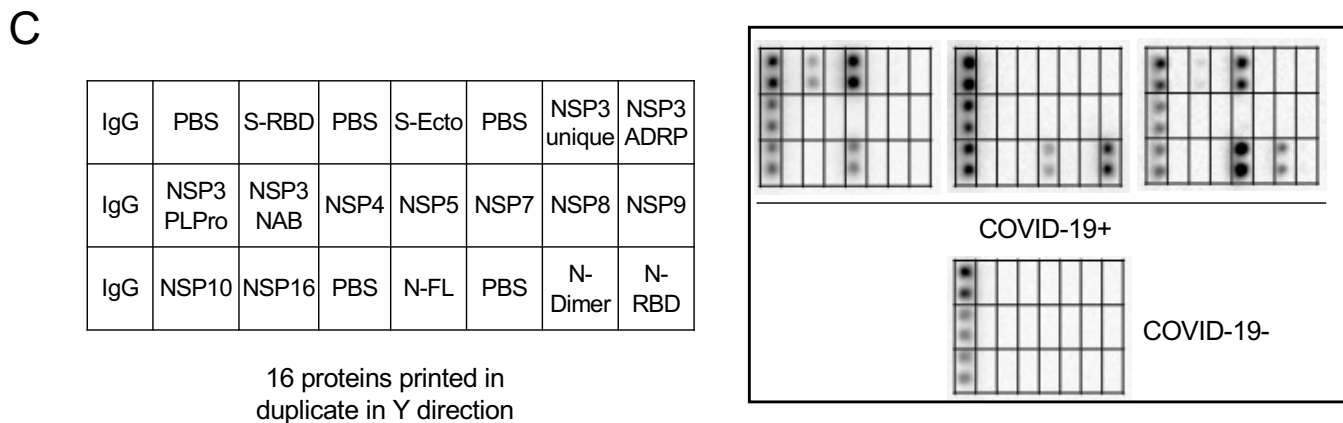

Supplemental Figure 1. Characterizing SARS-CoV-2 antibody responses using a proteome array. (A) A schematic diagram showing the major proteins of SARS-CoV-2. (B) Workflow for the production and screening of a SARS-CoV-2 proteome array. (C) Left, layout of the SARS-CoV-2 proteome array; Right, representative images of the proteome array probed with SARS-CoV-2-positive or -negative (based on NAT) plasma.

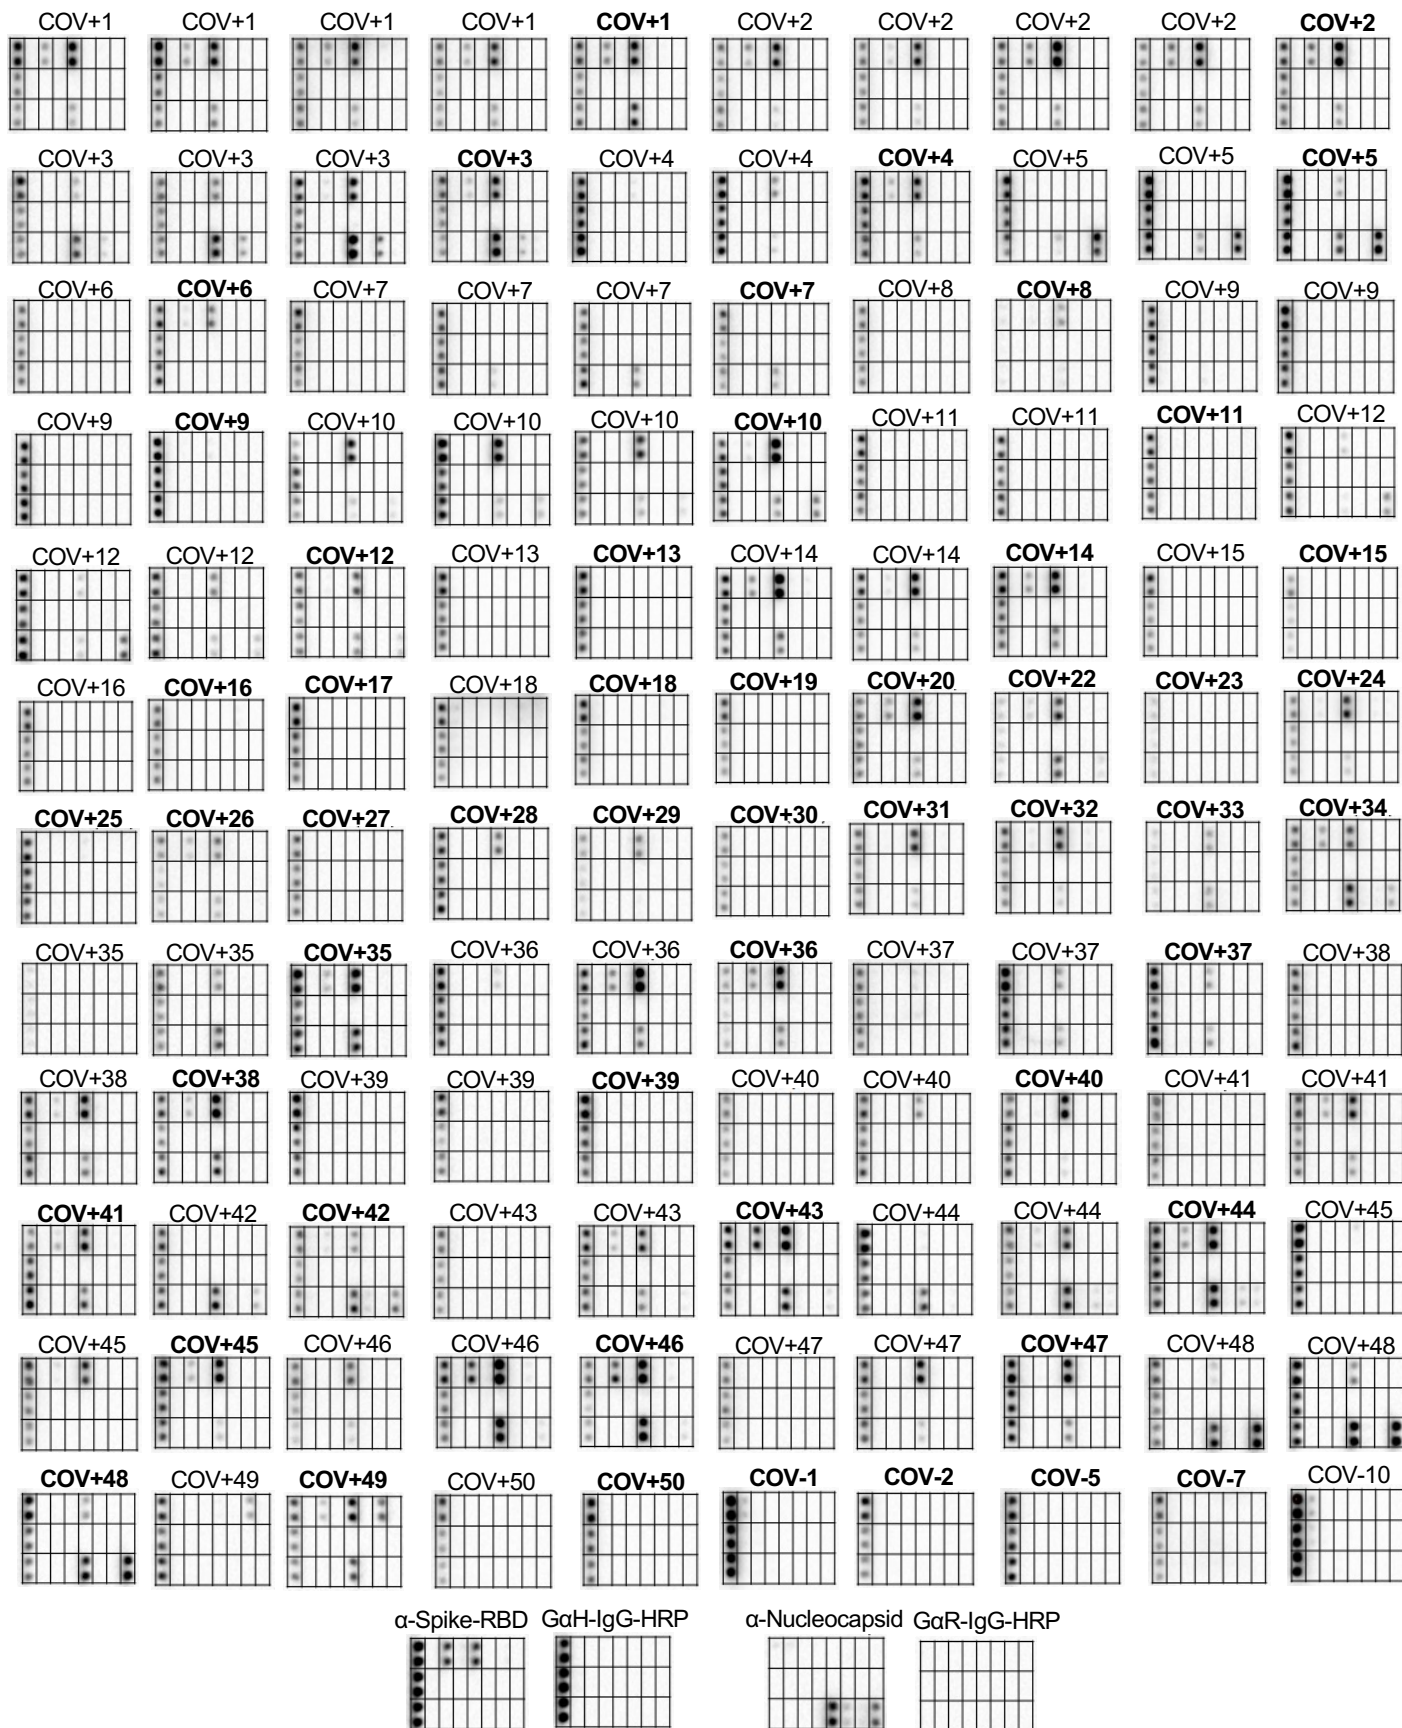

Supplemental Figure 2. Antibody responses profiled using the SARS-CoV-2 proteome array. Twenty-four copies of the grid were printed on a single nitrocellulose coated glass slide. Serial patient samples are shown sequentially and bold are the patient samples subsequently analyzed on the master array. All images shown were taken with 5.2 second exposure time.



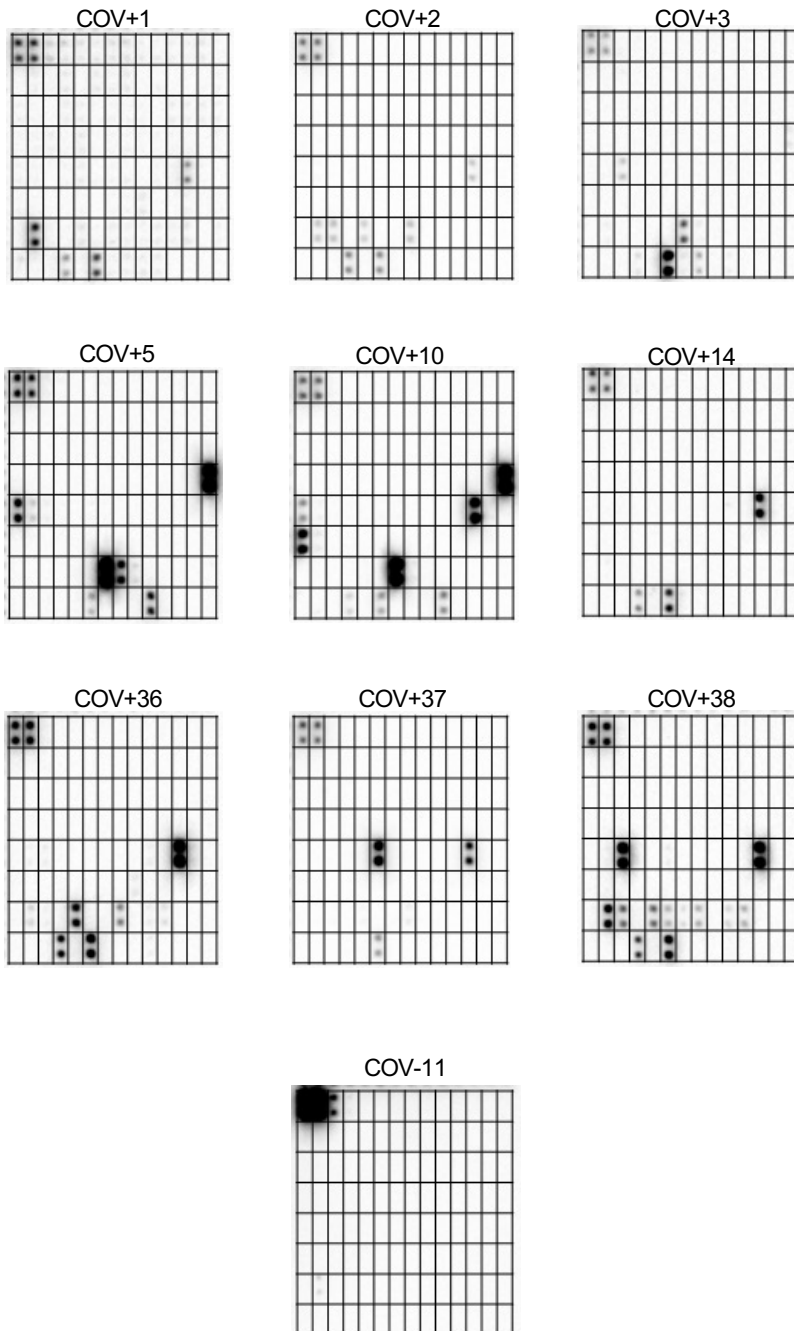

Supplemental Figure 3. Screening of a peptide array containing literature-reported epitopes. Three copies of the grid were printed on a single nitrocellulose coated glass slide. Images shown were taken with 5.2 second (COV+) or 60 second (COV-) exposure time.

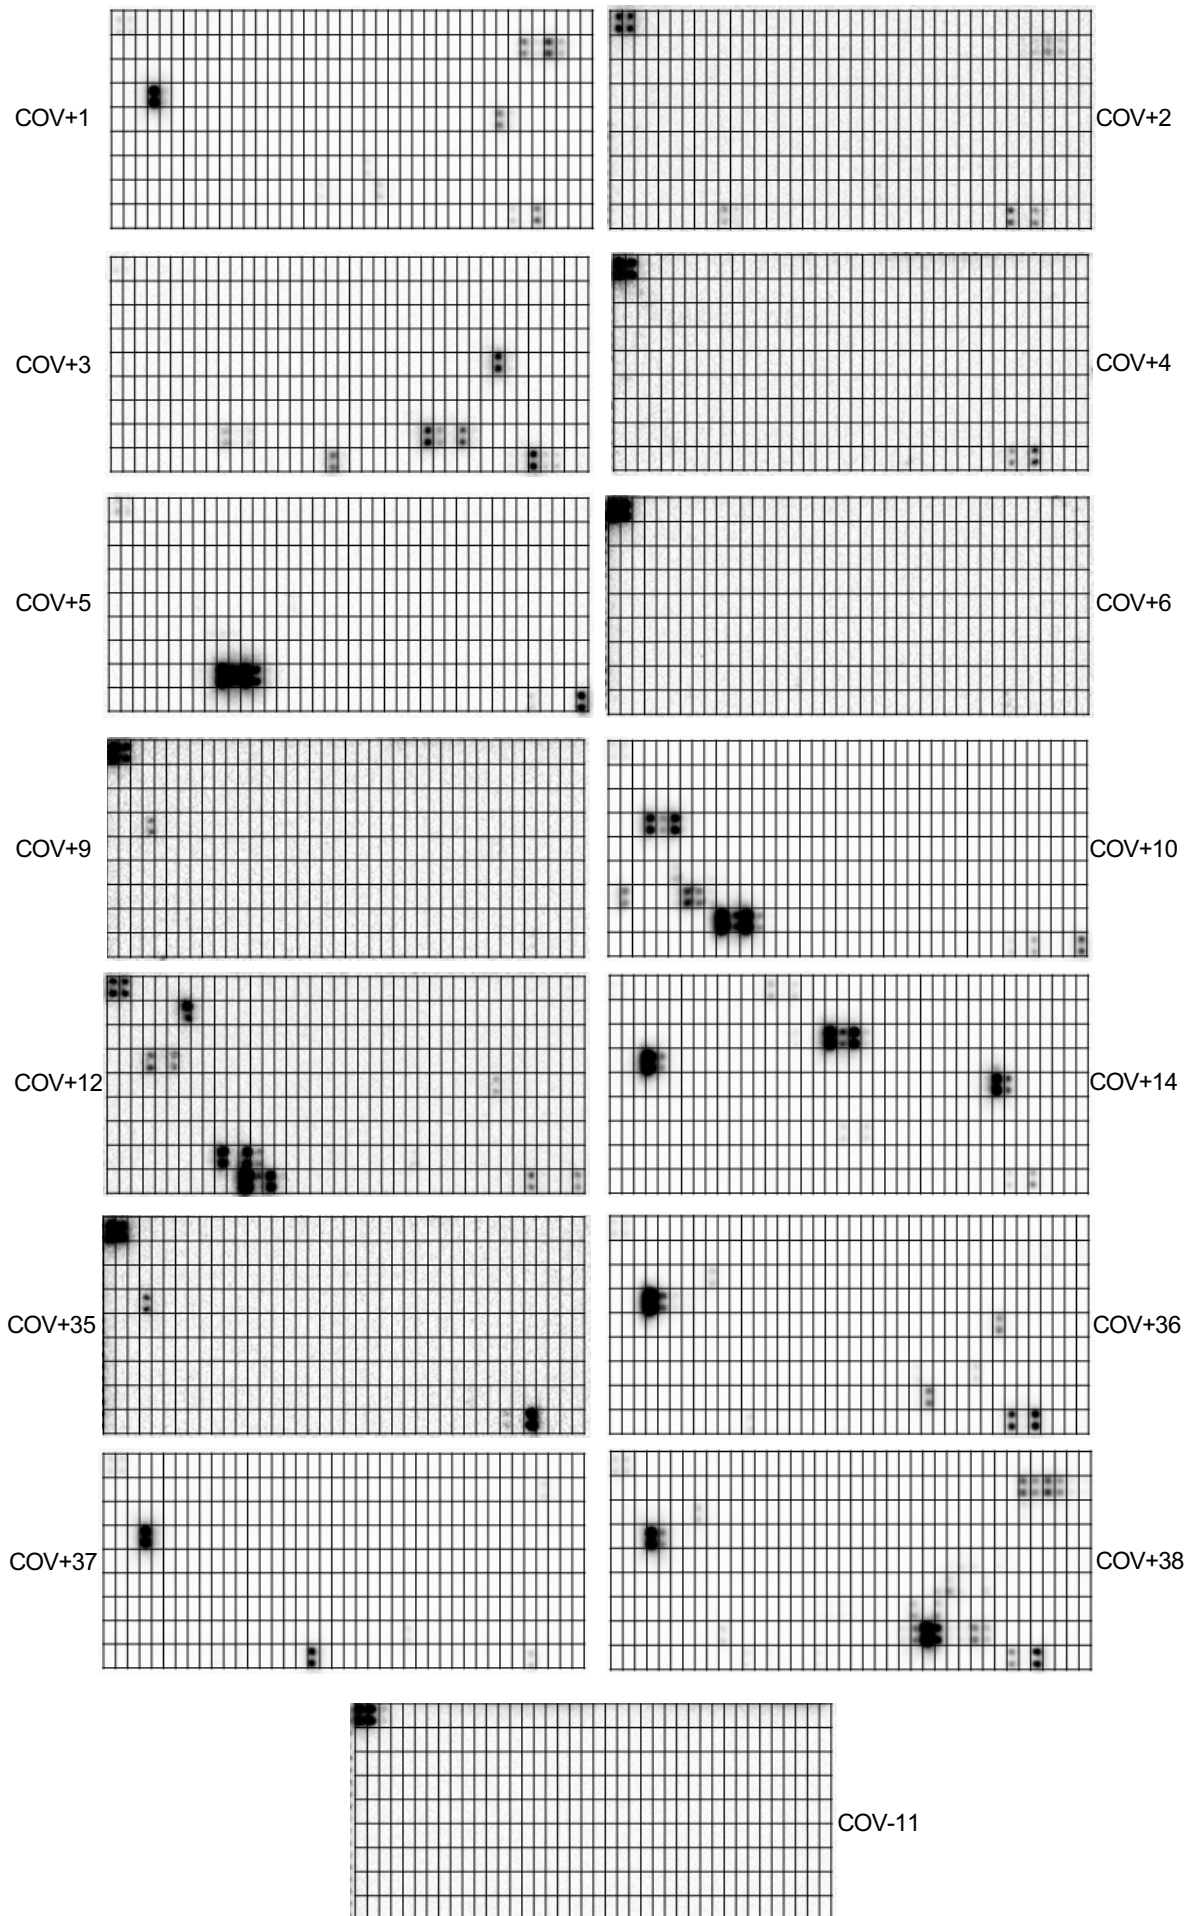

Supplemental Figure 4. Images from epitope mapping using peptide walking array. Two copies of the grid were printed on a single nitrocellulose coated glass slide. Images shown were taken with 5.2 second (COV+) or 60 second (COV-) exposure times.

A

|     |        |        |         |       |       |       |        |
|-----|--------|--------|---------|-------|-------|-------|--------|
| IgG | N-6    | N-156  | N-221   | N-246 | N-361 | N-381 | S-21   |
| IgG | S-176  | S-451  | S-551   | S-671 | S-811 | S-881 | S-1146 |
| IgG | S-1166 | S-1216 | N-Dimer | N-RBD | N-FL  | S-RBD | S-Ecto |

B

| Peptide | Sequence         |
|---------|------------------|
| N-6     | PQNQRNAPRITFGGP  |
| N-156   | AIVLQLPQGTTLPKG  |
| N-221   | LLLLDRLNQLESKMS  |
| N-246   | VTKKSAEASKKPRQ   |
| N-361   | KTFPPTEPKKDKKKK  |
| N-381   | ALPQRQKKQQTVTLL  |
| S-21    | RTQLPPAYTNSFTRG  |
| S-176   | LMDLEGKQGKFNLR   |
| S-451   | YLYRLFRRKSNLKPFE |
| S-551   | VLTESNKKFLPFQQF  |
| S-671   | CASYQTQNSPRRAR   |
| S-811   | KPSKRSEFIEDLLFNK |
| S-881   | TITSGWTFGAGAALQ  |
| S-1146  | DSFKEELDKYFKNHT  |
| S-1166  | LGDISGINASVVNIQ  |
| S-1216  | IWLGFIAGLIAVMV   |

C

| Protein                          | Printed Concentration |
|----------------------------------|-----------------------|
| IgG                              | 100nM                 |
| Nucleocapsid Dimerization Domain | 15 $\mu$ M            |
| Nucleocapsid RNA binding domain  | 1 $\mu$ M             |
| Nucleocapsid (Full Length)       | 2 $\mu$ M             |
| Spike-Receptor Binding Domain    | 14 $\mu$ M            |
| Spike-Ectodomain                 | 0.2 $\mu$ M           |

Supplemental Figure 5. SARS-CoV-2 Master Epitope Array. (A) Identity and position of peptides and proteins in the master array. All spots are printed in duplicate in the Y direction. (B) Peptide identities and sequences. (C) Protein concentrations printed on the array.

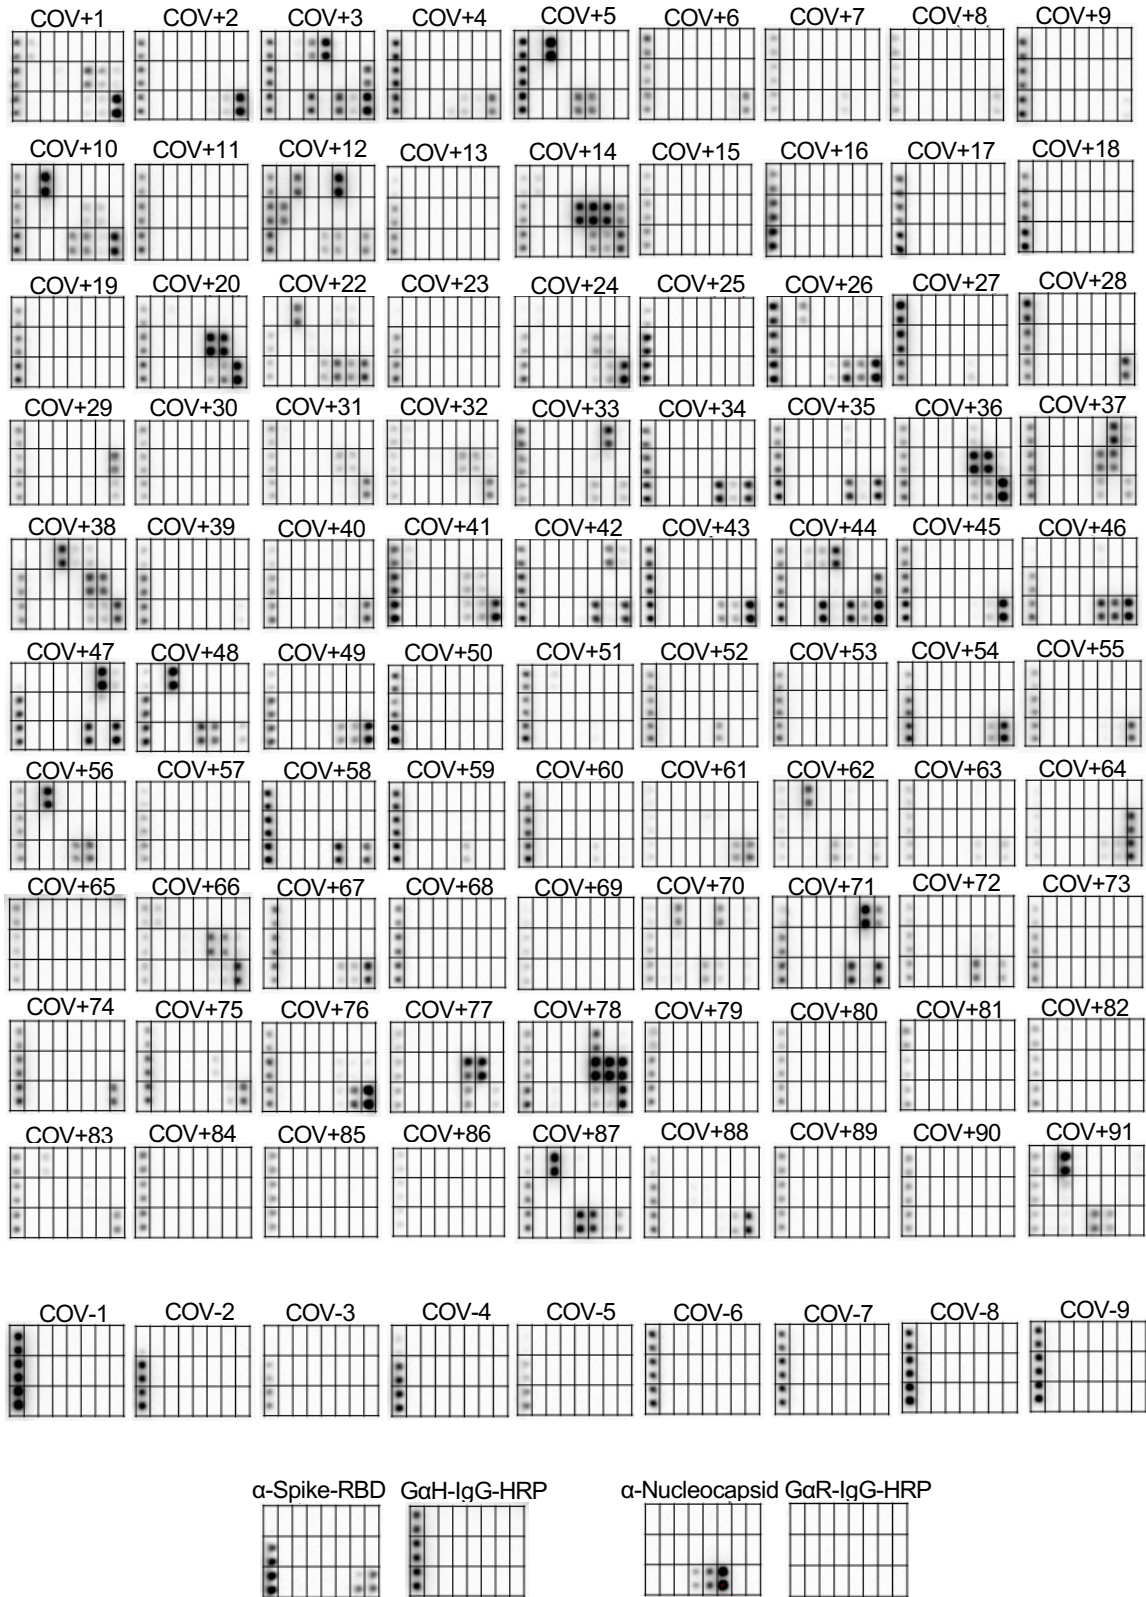

Supplemental Figure 6. Profiling antibody responses using the master array. Twenty-four copies of the grid were printed on a single nitrocellulose coated glass slide. All images shown were taken with 9.4 second exposure time.
